# Supplementary material for: Disposable ionic liquid-coated etched stainless steel fiber for headspace solid-phase microextraction of organophosphorus flame retardants from water samples
Source: Royal Society of Chemistry journal article supplement (doi:10.1039/c5ra03504j), 2015-01-01
Supplement: c5ra03504j1.pdf [file c5ra03504j1.pdf]

## SUPPORTING INFORMATION

Disposable ionic liquid-coated etched stainless steel fiber  
for headspace solid-phase microextraction of  
organophosphorus flame retardants from water samples

*Haiyan Kang, Xianli Wang, Yan Zhang, Junfeng Wu\*, Hongqiang Wang*

(School of Municipal and Environmental Engineering, Henan University of Urban  
Construction, Pingdingshan, 467036, China)

\* Corresponding author. Tel.: +86 375 2089079

*E-mail addresses:* [wangxianli1223@163.com](mailto:wangxianli1223@163.com) (J.F. Wu)

### **The preparation of IL-coated fused-silica SPME fiber**

With regard to the preparation of IL-coated fused-silica SPME fiber, the protective polyimide layer of a 1 cm segment of a 10 cm fused-silica fiber was removed using microflame torch<sup>42</sup> prior to coating. The fiber was then washed with methanol and dichloromethane successively, and conditioned at 160°C under nitrogen for 2 min in the GC injection port and then cooled to room temperature. The other coating procedure was same with the above-mentioned coating process of the IL-coated etched stainless steel fiber.

### **Chromatographic conditions**

The column temperature was programmed as follows: initial oven temperature 80 °C (held for 1 min), increased to 140 °C at a rate of 20 °C min<sup>-1</sup> (held for 2 min), and then increased to 280 °C at a rate of 4 °C min<sup>-1</sup> (held for 6 min). Both injector and detector temperatures were set at 250 °C. Helium (99.999%) was used as the carrier gas at a constant flow of 1.5 mL min<sup>-1</sup>, and nitrogen (99.999%) was used as the make-up gas at a flow rate of 20 mL min<sup>-1</sup>. Synthetic air (99.995%) and hydrogen (99.999%) were used as detector gases at flows of 100 and 65 mL min<sup>-1</sup>, respectively.

**Figure S1.** Effect of extraction time on extraction efficiency of the PFRs. Other experiment conditions: extraction temperature, 60 °C; stirring speed, 600 rpm; the concentration of salt, 30% (w/v); desorption time, 5 min.

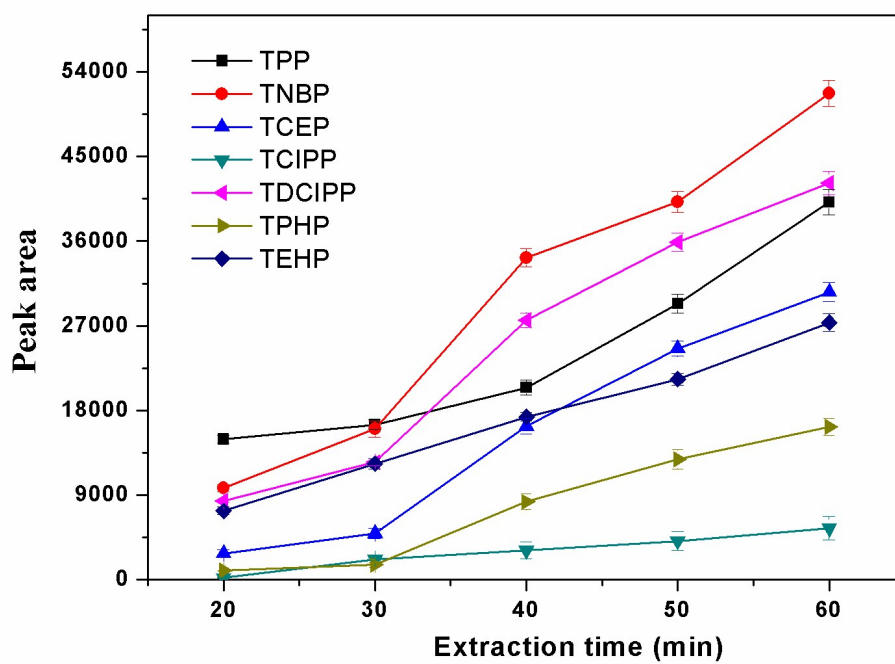

**Figure S2.** Effect of extraction temperature on extraction efficiency of PFRs. Other experiment conditions: extraction time, 40 min; stirring speed, 600 rpm; the concentration of salt, 30% (w/v); desorption time, 5 min.

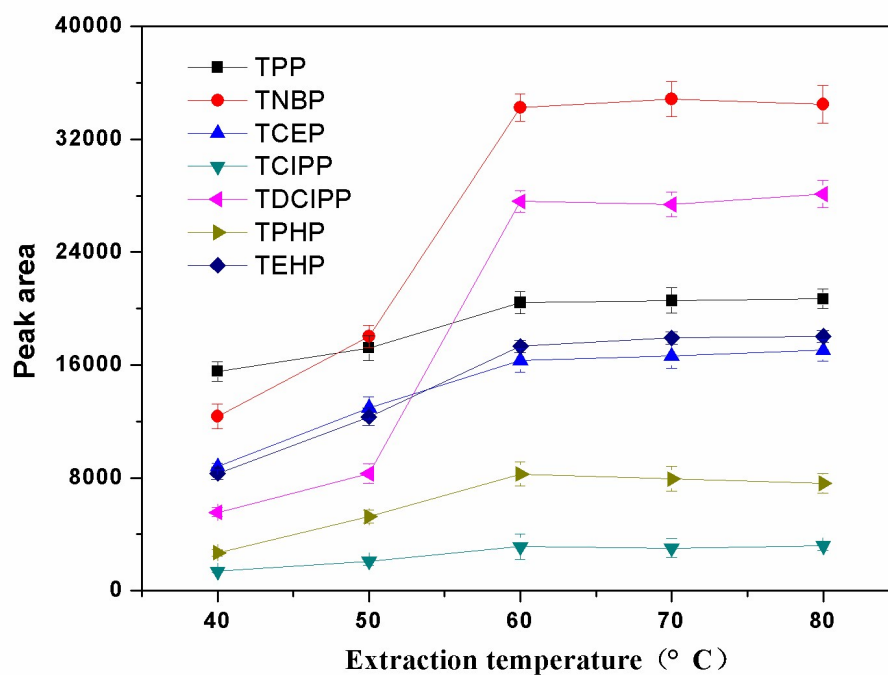

**Figure S3.** Effect of stirring speed on extraction efficiency of PFRs. Other experiment conditions: extraction time, 40 min; extraction temperature, 60 °C; the concentration of salt, 30% (w/v); desorption time, 5 min.

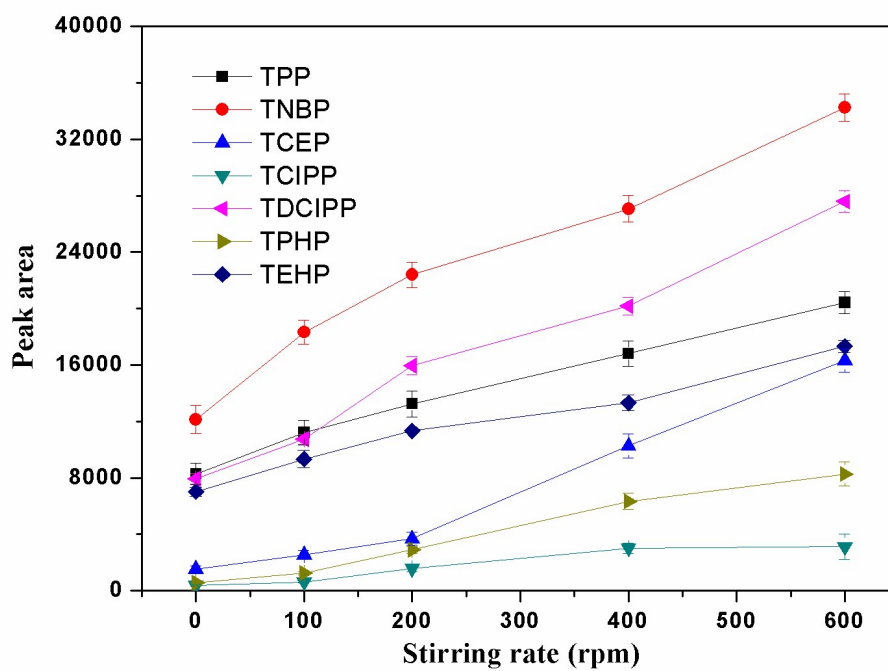

**Figure S4.** Effect of the addition of salt on extraction efficiency of PFRs. Other experiment conditions: extraction time, 40 min; extraction temperature, 60 °C; stirring speed, 600 rpm; desorption time, 5 min.

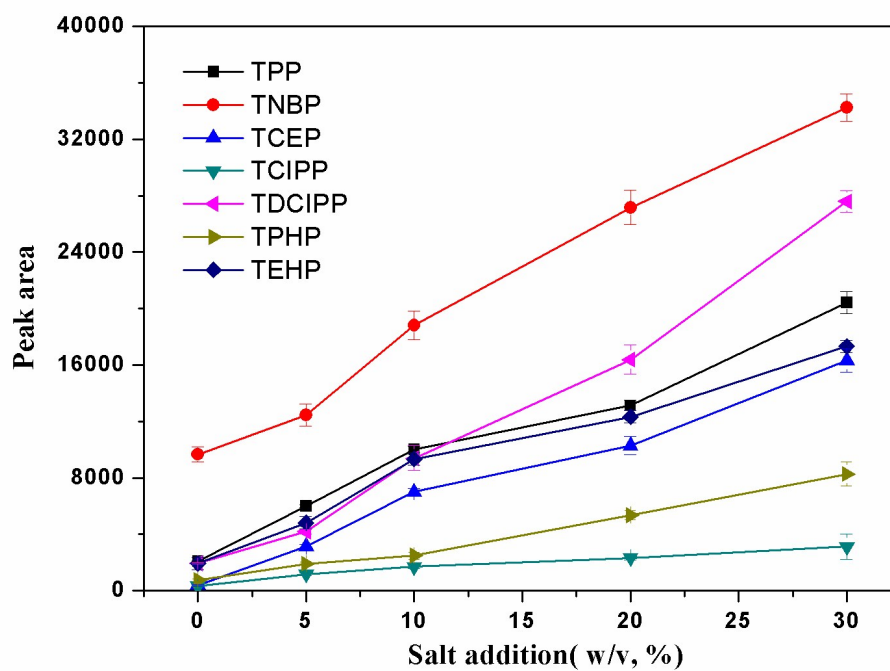

**Figure S5.** Effect of desorption time on extraction efficiency of PFRs. Other experiment conditions: extraction time, 40 min; extraction temperature, 60 °C; stirring speed, 600 rpm; the concentration of salt, 30% (w/v).

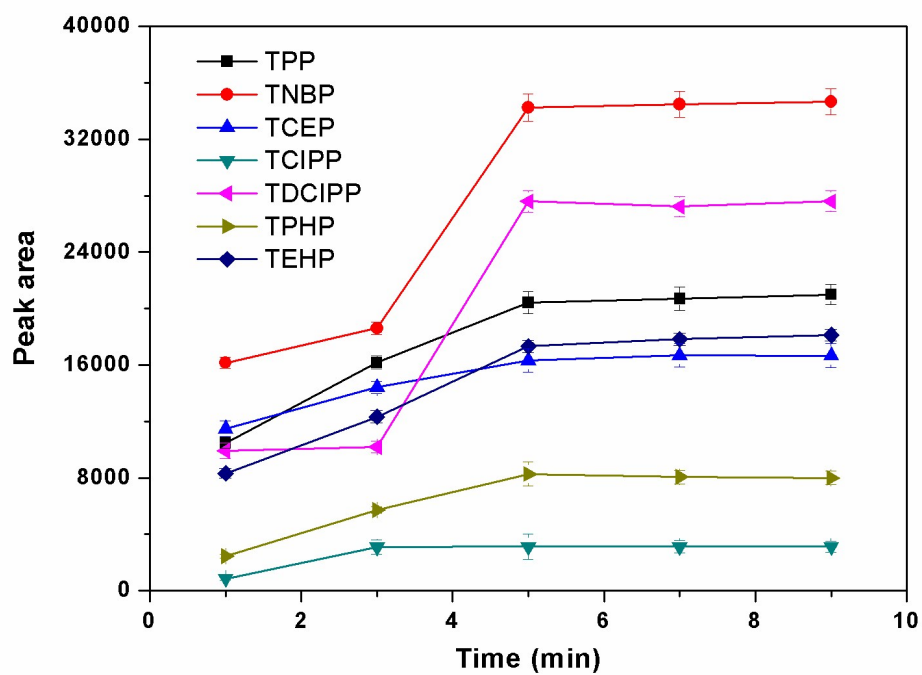

**Table S1**

Physicochemical properties of eight OPEs.

---

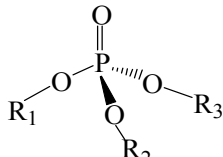

---

| Compound | Substituents                                                                                       | log $K_{ow}$ <sup>a</sup> | Solubility in water (mg/L) |
|----------|----------------------------------------------------------------------------------------------------|---------------------------|----------------------------|
| TCEP     | $R_1=R_2=R_3=$    | 1.44                      | $7.0 \times 10^3$          |
| TPP      | $R_1=R_2=R_3=$    | 1.87                      | 827                        |
| TCIPP    | $R_1=R_2=R_3=$    | 2.59                      | $1.6 \times 10^3$          |
| TDCIPP   | $R_1=R_2=R_3=$   | 3.8                       | 1.50                       |
| TNBP     | $R_1=R_2=R_3=$  | 4.00                      | 280                        |
| TPHP     | $R_1=R_2=R_3=$  | 4.59                      | $7.4 \times 10^{-2}$       |
| TEHP     | $R_1=R_2=R_3=$  | 9.49                      | 0.6                        |

---

<sup>a</sup> Data taken from Syracuse Research Corporation database of physico-chemical properties (<http://www.syrres.com/eSc/physdemo.htm>).
